# Supplementary material for: Is There a Relationship between the Concentration of Phenolic Compounds and the Versatility of Medicinal Plants in the Caatinga Biome?
Source: Preprints.org preprint supplement (doi:10.20944/preprints202408.2110.v1), 2024-08-29
Supplement: Supplementary file 1 [file supplementary]

## Sheet:  Preference_Data
		Total Phenol 760 nm				Residual phenol 760nm				Flavonoids 420 nm
Species	Sample weight (mg)	Extract volume (μl)	Absorbance (nm)	Average	Standard deviation	Extract volume (μl)	Absorbance (nm)	Average	Standard deviation	Extract volume (μl)	Absorbance (nm)	Average	Standard deviation
Myracrodun 1	501.7	125	0.522			375	0.508			1000	0.152
Myracrodun 2	503.5	125	0.529			375	0.507			1000	0.157
Myracrodun 3	504.7	125	0.53	0.527	0.0043589	375	0.484	0.499667	0.0135769	1000	0.144	0.151	0.00655744
Libdidia 1	501.9	125	0.391			375	0.083			1000	0.11
Libdidia 2	500.7	125	0.392			375	0.075			1000	0.107
Libdidia 3	503.7	125	0.399	0.394	0.0043589	375	0.089	0.0823333	0.00702377	1000	0.111	0.109333	0.00208167
Anadenanthera 1	504.2	125	0.571			375	0.138			1000	0.161
Anadenanthera 2	503	125	0.566			375	0.135			1000	0.108
Anadenanthera 3	502.4	125	0.568	0.568333	0.00251661	375	0.132	0.135	0.003	1000	0.106	0.125	0.0311929
Ximenia 1	503.3	125	0.402			375	0.333			1000	0.165
Ximenia 2	504.9	125	0.419			375	0.334			1000	0.164
Ximenia 3	503.2	125	0.428	0.416333	0.0132035	375	0.322	0.329667	0.00665833	1000	0.163	0.164	0.001
Handroanthus 1	503.7	250	0.301			750	0.165			1000	0.147
Handroanthus 2	504.8	250	0.295			750	0.171			1000	0.146
Handroanthus 3	501.9	250	0.3	0.298667	0.00321455	750	0.167	0.167667	0.00305505	1000	0.146	0.146333	0.00057735
Anarcardium 1	502.2	125	0.334			375	0.269			1000	0.137
Anarcardium 2	501.2	125	0.35			375	0.272			1000	0.136
Anarcardium 3	503.3	125	0.345	0.343	0.00818535	375	0.234	0.258333	0.0211266	1000	0.134	0.135667	0.00152753
Ziziphus 1	503.8	250	0.117			750	0.101			1000	0.063
Ziziphus 2	503.2	250	0.115			750	0.102			1000	0.062
Ziziphus 3	502.8	250	0.118	0.116667	0.00152753	750	0.091	0.098	0.00608276	1000	0.065	0.0633333	0.00152753
Hymenaea 1	504.9	250	0.51			750	0.161			1000	0.124
Hymenaea 2	504.7	250	0.502			750	0.12			1000	0.164
Hymenaea 3	503.9	250	0.509	0.507	0.0043589	750	0.13	0.137	0.0213776	1000	0.16	0.149333	0.0220303
Sideroxylon 1	502.5	250	0.442			750	0.106			1000	0.087
Sideroxylon 2	502.3	250	0.442			750	0.121			1000	0.089
Sideroxylon 3	502.8	250	0.458	0.447333	0.0092376	750	0.106	0.111	0.00866025	1000	0.079	0.085	0.0052915
Poincianella 1	501.2	250	0.42			750	0.106			1000	0.123
Poincianella 2	500	250	0.422			750	0.096			1000	0.125
Poincianella 3	502.5	250	0.436	0.426	0.0087178	750	0.097	0.0996667	0.00550757	1000	0.116	0.121333	0.00472582
Aspidosperma 1	500.9	250	0.253			750	0.162			1000	0.104
Aspidosperma 2	501.6	250	0.263			750	0.178			1000	0.101
Aspidosperma 3	503.9	250	0.249	0.255	0.0072111	750	0.163	0.167667	0.00896289	1000	0.102	0.102333	0.00152753
Mimosa 1	504	125	0.546			375	0.336			1000	0.164
Mimosa 2	504.6	125	0.543			375	0.322			1000	0.16
Mimosa 3	503.7	125	0.564	0.551	0.0113578	375	0.369	0.342333	0.0241316	1000	0.164	0.162667	0.0023094
Commiphora 1	503.2	250	0.315			750	0.086			1000	0.1
Commiphora 2	503.4	250	0.315			750	0.084			1000	0.102
Commiphora 3	503.1	250	0.338	0.322667	0.0132791	750	0.083	0.0843333	0.00152753	1000	0.106	0.102667	0.00305505
Schinopsis 1	504	125	0.517			375	0.144			1000	0.192
Schinopsis 2	503.8	125	0.497			375	0.146			1000	0.195
Schinopsis 3	502.7	125	0.492	0.502	0.0132288	375	0.142	0.144	0.002	1000	0.206	0.197667	0.00737111
Senegalia b 1	504.8	250	0.171			750	0.131			1000	0.098
Senegalia b 2	503.9	250	0.163			750	0.135			1000	0.098
Senegalia b 3	502.3	250	0.167	0.167	0.004	750	0.13	0.132	0.00264575	1000	0.098	0.098	1.69967e-17
Peltogyne 1	501.8	250	0.461			750	0.138			1000	0.094
Peltogyne 2	503.6	250	0.475			750	0.146			1000	0.097
Peltogyne 3	503.7	250	0.482	0.472667	0.0106927	750	0.145	0.143	0.0043589	1000	0.096	0.0956667	0.00152753
Piptadenia 1	503.3	250	0.173			750	0.113			1000	0.073
Piptadenia 2	502.2	250	0.17			750	0.112			1000	0.072
Piptadenia 3	503.9	250	0.173	0.172	0.00173205	750	0.115	0.113333	0.00152753	1000	0.072	0.0723333	0.00057735
Byrsonima 1	504.9	125	0.474			375	0.108			1000	0.093
Byrsonima 2	501.3	125	0.476			375	0.113			1000	0.105
Byrsonima 3	500.6	125	0.393	0.447667	0.0473533	375	0.086	0.102333	0.0143643	1000	0.103	0.100333	0.0064291
Erythroxylum 1	504.5	250	0.418			750	0.145			1000	0.106
Erythroxylum 2	504.6	250	0.402			750	0.137			1000	0.104
Erythroxylum 3	504.1	250	0.398	0.406	0.010583	750	0.144	0.142	0.0043589	1000	0.103	0.104333	0.00152753
Pityrocarpa 1	502.4	250	0.566			750	0.128			1000	0.101
Pityrocarpa 2	502.6	250	0.567			750	0.112			1000	0.094
Pityrocarpa 3	502.9	250	0.56	0.564333	0.00378594	750	0.114	0.118	0.0087178	1000	0.097	0.0973333	0.00351188

## Sheet:  Phenol_calculations
	Readings at 760 nm in a quartz cuvette
	Tannic acid standard solution 0.1 mg/ml
	Folin 1.25 ml
	Sodium carbonate 2.5 ml
	Final volume 25 ml
			Tannic acid (mg/ml)	ABS (nm)
		White	0	0.045
			0.1	0.071
			0.5	0.177
			1.5	0.349
			2.5	0.483
			3.5	0.578
			4.5	0.603
		Curve: Y = 0.1539
	Absorbance (nm)
Species	Total Phenol 760 nm	ABS in the corner (µg FT)	Extract aliquot (µL)	Extraction 25 mL/Aliquot (µg FT)	(µg FT to mg FT)	Sample weight (mg)	FT quantity in 1 g (1000 mg)	mg FT/100 g DM	Average	Standard deviation
Myracrodun 1	0.522	2.89734	125	579.467	0.579467	501.7	1.15501	115.501
Myracrodun 2	0.529	2.94282	125	588.564	0.588564	503.5	1.16895	116.895
Myracrodun 3	0.53	2.94932	125	589.864	0.589864	504.7	1.16874	116.874	116.423	0.798876
Libdidia 1	0.391	2.04613	125	409.227	0.409227	501.9	0.815355	81.5355
Libdidia 2	0.392	2.05263	125	410.526	0.410526	500.7	0.819905	81.9905
Libdidia 3	0.399	2.09812	125	419.623	0.419623	503.7	0.833081	83.3081	82.278	0.920638
Anadenanthera 1	0.571	3.21572	125	643.145	0.643145	504.2	1.27557	127.557
Anadenanthera 2	0.566	3.18324	125	636.647	0.636647	503	1.2657	126.57
Anadenanthera 3	0.568	3.19623	125	639.246	0.639246	502.4	1.27239	127.239	127.122	0.503944
Ximenia 1	0.402	2.11761	125	423.522	0.423522	503.3	0.84149	84.149
Ximenia 2	0.419	2.22807	125	445.614	0.445614	504.9	0.882579	88.2579
Ximenia 3	0.428	2.28655	125	457.31	0.45731	503.2	0.908804	90.8804	87.7624	3.39293
Handroanthus 1	0.301	1.46134	250	146.134	0.146134	503.7	0.290121	29.0121
Handroanthus 2	0.295	1.42235	250	142.235	0.142235	504.8	0.281765	28.1765
Handroanthus 3	0.3	1.45484	250	145.484	0.145484	501.9	0.289867	28.9867	28.7251	0.475228
Anarcardium 1	0.334	1.67576	125	335.153	0.335153	502.2	0.667369	66.7369
Anarcardium 2	0.35	1.77973	125	355.945	0.355945	501.2	0.710186	71.0186
Anarcardium 3	0.345	1.74724	125	349.448	0.349448	503.3	0.694313	69.4313	69.0623	2.16459
Ziziphus 1	0.117	0.265757	250	26.5757	0.0265757	503.8	0.0527505	5.27505
Ziziphus 2	0.115	0.252762	250	25.2762	0.0252762	503.2	0.0502308	5.02308
Ziziphus 3	0.118	0.272255	250	27.2255	0.0272255	502.8	0.0541477	5.41477	5.23763	0.198507
Hymenaea 1	0.51	2.81936	250	281.936	0.281936	504.9	0.5584	55.84
Hymenaea 2	0.502	2.76738	250	276.738	0.276738	504.7	0.548322	54.8322
Hymenaea 3	0.509	2.81287	250	281.287	0.281287	503.9	0.558219	55.8219	55.498	0.576706
Sideroxylon 1	0.442	2.37752	250	237.752	0.237752	502.5	0.473138	47.3138
Sideroxylon 2	0.442	2.37752	250	237.752	0.237752	502.3	0.473326	47.3326
Sideroxylon 3	0.458	2.48148	250	248.148	0.248148	502.8	0.493533	49.3533	47.9999	1.17208
Poincianella 1	0.42	2.23457	250	223.457	0.223457	501.2	0.445844	44.5844
Poincianella 2	0.422	2.24756	250	224.756	0.224756	500	0.449513	44.9513
Poincianella 3	0.436	2.33853	250	233.853	0.233853	502.5	0.465379	46.5379	45.3579	1.03832	66.5466	37.955
Aspidosperma 1	0.253	1.14945	250	114.945	0.114945	500.9	0.229476	22.9476
Aspidosperma 2	0.263	1.21442	250	121.442	0.121442	501.6	0.24211	24.211
Aspidosperma 3	0.249	1.12346	250	112.346	0.112346	503.9	0.222952	22.2952	23.1513	0.973997
Mimosa 1	0.546	3.05328	125	610.656	0.610656	504	1.21162	121.162
Mimosa 2	0.543	3.03379	125	606.758	0.606758	504.6	1.20245	120.245
Mimosa 3	0.564	3.17024	125	634.048	0.634048	503.7	1.25878	125.878	122.428	3.02246
Commiphora 1	0.315	1.55231	250	155.231	0.155231	503.2	0.308487	30.8487
Commiphora 2	0.315	1.55231	250	155.231	0.155231	503.4	0.308364	30.8364
Commiphora 3	0.338	1.70175	250	170.175	0.170175	503.1	0.338254	33.8254	31.8368	1.72213
Schinopsis 1	0.517	2.86485	125	572.969	0.572969	504	1.13684	113.684
Schinopsis 2	0.497	2.73489	125	546.979	0.546979	503.8	1.08571	108.571
Schinopsis 3	0.492	2.7024	125	540.481	0.540481	502.7	1.07516	107.516	109.924	3.29947
Senegalia b 1	0.171	0.616634	250	61.6634	0.0616634	504.8	0.122154	12.2154
Senegalia b 2	0.163	0.564652	250	56.4652	0.0564652	503.9	0.112056	11.2056
Senegalia b 3	0.167	0.590643	250	59.0643	0.0590643	502.3	0.117588	11.7588	11.7266	0.505654
Peltogyne 1	0.461	2.50097	250	250.097	0.250097	501.8	0.498401	49.8401
Peltogyne 2	0.475	2.59194	250	259.194	0.259194	503.6	0.514683	51.4683
Peltogyne 3	0.482	2.63743	250	263.743	0.263743	503.7	0.523611	52.3611	51.2231	1.27825
Piptadenia 1	0.173	0.62963	250	62.963	0.062963	503.3	0.1251	12.51
Piptadenia 2	0.17	0.610136	250	61.0136	0.0610136	502.2	0.121493	12.1493
Piptadenia 3	0.173	0.62963	250	62.963	0.062963	503.9	0.124951	12.4951	12.3848	0.204117
Byrsonima 1	0.474	2.58545	125	517.089	0.517089	504.9	1.02414	102.414
Byrsonima 2	0.476	2.59844	125	519.688	0.519688	501.3	1.03668	103.668
Byrsonima 3	0.393	2.05913	125	411.826	0.411826	500.6	0.822665	82.2665	96.1162	12.0106
Erythroxylum 1	0.418	2.22157	250	222.157	0.222157	504.5	0.440351	44.0351
Erythroxylum 2	0.402	2.11761	250	211.761	0.211761	504.6	0.419661	41.9661
Erythroxylum 3	0.398	2.09162	250	209.162	0.209162	504.1	0.414921	41.4921	42.4978	1.35231
Pityrocarpa 1	0.566	3.18324	250	318.324	0.318324	502.4	0.633606	63.3606
Pityrocarpa 2	0.567	3.18973	250	318.973	0.318973	502.6	0.634647	63.4647
Pityrocarpa 3	0.56	3.14425	250	314.425	0.314425	502.9	0.625224	62.5224	63.1159	0.516619	56.4405	40.4268

## Sheet:  tannin_calculations
	Readings at 760 nm in a quartz cuvette
	Tannic acid standard solution 0.1 mg/ml
	Folin 1.25 ml
	Sodium carbonate 2.5 ml
	Final volume 25 ml
			Tannic acid (mg/ml)	ABS (nm)
		White	0	0.045
			0.1	0.071
			0.5	0.177
			1.5	0.349
			2.5	0.483
			3.5	0.578
			4.5	0.603
		Curve: Y = 0.1539
	Absorbance (nm)										Amount of Tannins
Species	Residual Phenol 760 nm	ABS in the curve (µg FR)	Extract aliquot (µL)	Extraction 25 mL/Aliquot (µg FR)	(µg FR to mg FR)	Sample weight (mg)	FR quantity in 1 g	mg FR/100 g DM	Average	Standard deviation	FT quantity in 1 g (1000 mg)	FR quantity in 1 g	Tannins mg/100 g DM	Average	Standard deviation
Myracrodun 1	0.508	2.80637	375	187.091	0.187091	501.7	0.372914	37.2914			1.15501	0.372914	78.2093
Myracrodun 2	0.507	2.79987	375	186.658	0.186658	503.5	0.370721	37.0721			1.16895	0.370721	79.8224
Myracrodun 3	0.484	2.65042	375	176.695	0.176695	504.7	0.350099	35.0099	36.4578	1.25873	1.16874	0.350099	81.8642	79.9653	1.83165
Libdidia 1	0.083	0.0448343	375	2.98895	0.00298895	501.9	0.00595528	0.595528			0.815355	0.00595528	80.94
Libdidia 2	0.075	-0.0071475	375	-0.4765	-0.0004765	500.7	-0.000951667	-0.0951667			0.819905	-0.000951667	82.0856
Libdidia 3	0.089	0.0838207	375	5.58804	0.00558804	503.7	0.011094	1.1094	0.536587	0.604442	0.833081	0.011094	82.1987	81.7415	0.696393
Anadenanthera 1	0.138	0.402209	375	26.8139	0.0268139	504.2	0.0531812	5.31812			1.27557	0.0531812	122.239
Anadenanthera 2	0.135	0.382716	375	25.5144	0.0255144	503	0.0507245	5.07245			1.2657	0.0507245	121.498
Anadenanthera 3	0.132	0.363223	375	24.2149	0.0242149	502.4	0.0481984	4.81984	5.07013	0.249149	1.27239	0.0481984	122.419	122.052	0.488341
Ximenia 1	0.333	1.66927	375	111.284	0.111284	503.3	0.221109	22.1109			0.84149	0.221109	62.038
Ximenia 2	0.334	1.67576	375	111.718	0.111718	504.9	0.221267	22.1267			0.882579	0.221267	66.1312
Ximenia 3	0.322	1.59779	375	106.519	0.106519	503.2	0.211684	21.1684	21.802	0.548775	0.908804	0.211684	69.712	65.9604	3.83982
Handroanthus 1	0.165	0.577648	750	19.2549	0.0192549	503.7	0.038227	3.8227			0.290121	0.038227	25.1894
Handroanthus 2	0.171	0.616634	750	20.5545	0.0205545	504.8	0.0407181	4.07181			0.281765	0.0407181	24.1047
Handroanthus 3	0.167	0.590643	750	19.6881	0.0196881	501.9	0.0392272	3.92272	3.93907	0.125357	0.289867	0.0392272	25.064	24.786	0.593332
Anarcardium 1	0.269	1.25341	375	83.5608	0.0835608	502.2	0.166389	16.6389			0.667369	0.166389	50.098
Anarcardium 2	0.272	1.2729	375	84.8603	0.0848603	501.2	0.169314	16.9314			0.710186	0.169314	54.0872
Anarcardium 3	0.234	1.02599	375	68.3994	0.0683994	503.3	0.135902	13.5902	15.7202	1.85042	0.694313	0.135902	55.8411	53.3421	2.94319
Ziziphus 1	0.101	0.161793	750	5.39311	0.00539311	503.8	0.0107049	1.07049			0.0527505	0.0107049	4.20456
Ziziphus 2	0.102	0.168291	750	5.6097	0.0056097	503.2	0.0111481	1.11481			0.0502308	0.0111481	3.90828
Ziziphus 3	0.091	0.0968161	750	3.2272	0.0032272	502.8	0.00641846	0.641846	0.94238	0.261211	0.0541477	0.00641846	4.77293	4.29525	0.439401
Hymenaea 1	0.161	0.551657	750	18.3886	0.0183886	504.9	0.0364202	3.64202			0.5584	0.0364202	52.198
Hymenaea 2	0.12	0.28525	750	9.50834	0.00950834	504.7	0.0188396	1.88396			0.548322	0.0188396	52.9482
Hymenaea 3	0.13	0.350227	750	11.6742	0.0116742	503.9	0.0231678	2.31678	2.61425	0.916004	0.558219	0.0231678	53.5051	52.8838	0.655934
Sideroxylon 1	0.106	0.194282	750	6.47607	0.00647607	502.5	0.0128877	1.28877			0.473138	0.0128877	46.025
Sideroxylon 2	0.121	0.291748	750	9.72493	0.00972493	502.3	0.0193608	1.93608			0.473326	0.0193608	45.3965
Sideroxylon 3	0.106	0.194282	750	6.47607	0.00647607	502.8	0.01288	1.288	1.50428	0.373947	0.493533	0.01288	48.0653	46.4956	1.3952
Poincianella 1	0.106	0.194282	750	6.47607	0.00647607	501.2	0.0129211	1.29211			0.445844	0.0129211	43.2922
Poincianella 2	0.096	0.129305	750	4.31016	0.00431016	500	0.00862032	0.862032			0.449513	0.00862032	44.0892
Poincianella 3	0.097	0.135802	750	4.52675	0.00452675	502.5	0.00900846	0.900846	1.01833	0.237895	0.465379	0.00900846	45.6371	44.3395	1.19229	57.5861	32.5996
Aspidosperma 1	0.162	0.558155	750	18.6052	0.0186052	500.9	0.0371435	3.71435			0.229476	0.0371435	19.2333
Aspidosperma 2	0.178	0.662118	750	22.0706	0.0220706	501.6	0.0440004	4.40004			0.24211	0.0440004	19.811
Aspidosperma 3	0.163	0.564652	750	18.8217	0.0188217	503.9	0.0373521	3.73521	3.94987	0.390002	0.222952	0.0373521	18.56	19.2014	0.62609
Mimosa 1	0.336	1.68876	375	112.584	0.112584	504	0.223381	22.3381			1.21162	0.223381	98.8239
Mimosa 2	0.322	1.59779	375	106.519	0.106519	504.6	0.211097	21.1097			1.20245	0.211097	99.1356
Mimosa 3	0.369	1.90318	375	126.879	0.126879	503.7	0.251894	25.1894	22.879	2.09296	1.25878	0.251894	100.689	99.5494	0.998923
Commiphora 1	0.086	0.0643275	750	2.14425	0.00214425	503.2	0.00426123	0.426123			0.308487	0.00426123	30.4226
Commiphora 2	0.084	0.051332	750	1.71107	0.00171107	503.4	0.00339902	0.339902			0.308364	0.00339902	30.4965
Commiphora 3	0.083	0.0448343	750	1.49448	0.00149448	503.1	0.00297054	0.297054	0.35436	0.0657379	0.338254	0.00297054	33.5283	31.4825	1.77213
Schinopsis 1	0.144	0.441196	375	29.413	0.029413	504	0.0583592	5.83592			1.13684	0.0583592	107.848
Schinopsis 2	0.146	0.454191	375	30.2794	0.0302794	503.8	0.060102	6.0102			1.08571	0.060102	102.56
Schinopsis 3	0.142	0.4282	375	28.5467	0.0285467	502.7	0.0567867	5.67867	5.8416	0.165839	1.07516	0.0567867	101.837	104.082	3.28194
Senegalia b 1	0.131	0.356725	750	11.8908	0.0118908	504.8	0.0235555	2.35555			0.122154	0.0235555	9.85986
Senegalia b 2	0.135	0.382716	750	12.7572	0.0127572	503.9	0.0253169	2.53169			0.112056	0.0253169	8.67395
Senegalia b 3	0.13	0.350227	750	11.6742	0.0116742	502.3	0.0232416	2.32416	2.4038	0.111864	0.117588	0.0232416	9.43462	9.32281	0.600809
Peltogyne 1	0.138	0.402209	750	13.407	0.013407	501.8	0.0267178	2.67178			0.498401	0.0267178	47.1683
Peltogyne 2	0.146	0.454191	750	15.1397	0.0151397	503.6	0.0300629	3.00629			0.514683	0.0300629	48.462
Peltogyne 3	0.145	0.447693	750	14.9231	0.0149231	503.7	0.029627	2.9627	2.88026	0.18186	0.523611	0.029627	49.3984	48.3429	1.1198
Piptadenia 1	0.113	0.239766	750	7.9922	0.0079922	503.3	0.0158796	1.58796			0.1251	0.0158796	10.9221
Piptadenia 2	0.112	0.233268	750	7.77561	0.00777561	502.2	0.0154831	1.54831			0.121493	0.0154831	10.601
Piptadenia 3	0.115	0.252762	750	8.42538	0.00842538	503.9	0.0167204	1.67204	1.60277	0.0631779	0.124951	0.0167204	10.8231	10.782	0.164442
Byrsonima 1	0.108	0.207277	375	13.8185	0.0138185	504.9	0.0273688	2.73688			1.02414	0.0273688	99.6773
Byrsonima 2	0.113	0.239766	375	15.9844	0.0159844	501.3	0.0318859	3.18859			1.03668	0.0318859	100.479
Byrsonima 3	0.086	0.0643275	375	4.2885	0.0042885	500.6	0.00856672	0.856672	2.26071	1.23673	0.822665	0.00856672	81.4098	93.8555	10.7858
Erythroxylum 1	0.145	0.447693	750	14.9231	0.0149231	504.5	0.02958	2.958			0.440351	0.02958	41.0771
Erythroxylum 2	0.137	0.395712	750	13.1904	0.0131904	504.6	0.0261403	2.61403			0.419661	0.0261403	39.3521
Erythroxylum 3	0.144	0.441196	750	14.7065	0.0147065	504.1	0.0291738	2.91738	2.8298	0.187967	0.414921	0.0291738	38.5747	39.668	1.28076
Pityrocarpa 1	0.128	0.337232	750	11.2411	0.0112411	502.4	0.0223747	2.23747			0.633606	0.0223747	61.1231
Pityrocarpa 2	0.112	0.233268	750	7.77561	0.00777561	502.6	0.0154708	1.54708			0.634647	0.0154708	61.9176
Pityrocarpa 3	0.114	0.246264	750	8.20879	0.00820879	502.9	0.0163229	1.63229	1.80561	0.37642	0.625224	0.0163229	60.8901	61.3103	0.538711	51.7597	36.5055

## Sheet:  Flavonoid_calculations
	Readings at 420 nm in a glass cuvette
	Rutin standard solution 0.5 mg/ml
	Acetic acid 0.6 ml
	Pyridine 10 ml
	Aluminum chloride 2.5 ml
	Final volume 25 ml
			Rutin (mg/ml)	ABS (nm)
		White	0	0.051
			0.2	0.144
			0.4	0.251
			0.6	0.359
			0.8	0.463
			1	0.563
			1.2	0.644
		Curve: Y = 0.5179
	Absorbance (nm)
Species	Flavonoids 420 nm	ABS in the corner (µg FV)	Extract aliquot (µL)	Extraction 25 mL/Aliquot (µg FV)	(µg FV to mg FV)	Sample weight (mg)	FV quantity in 1 g	mg FV/100 g DM	Average	Standard deviation
Myracrodun 1	0.152	0.204287	1000	5.10716	0.00510716	501.7	0.0101797	1.01797
Myracrodun 2	0.157	0.213941	1000	5.34852	0.00534852	503.5	0.0106227	1.06227
Myracrodun 3	0.144	0.18884	1000	4.72099	0.00472099	504.7	0.00935405	0.935405	1.00522	0.0643867
Libdidia 1	0.11	0.12319	1000	3.07975	0.00307975	501.9	0.00613617	0.613617
Libdidia 2	0.107	0.117397	1000	2.93493	0.00293493	500.7	0.00586165	0.586165
Libdidia 3	0.111	0.125121	1000	3.12802	0.00312802	503.7	0.00621008	0.621008	0.60693	0.0183587
Anadenanthera 1	0.161	0.221664	1000	5.54161	0.00554161	504.2	0.0109909	1.09909
Anadenanthera 2	0.108	0.119328	1000	2.9832	0.0029832	503	0.00593082	0.593082
Anadenanthera 3	0.106	0.115466	1000	2.88666	0.00288666	502.4	0.00574574	0.574574	0.755582	0.297631
Ximenia 1	0.165	0.229388	1000	5.7347	0.0057347	503.3	0.0113942	1.13942
Ximenia 2	0.164	0.227457	1000	5.68643	0.00568643	504.9	0.0112625	1.12625
Ximenia 3	0.163	0.225526	1000	5.63815	0.00563815	503.2	0.0112046	1.12046	1.12871	0.00971641
Handroanthus 1	0.147	0.194632	1000	4.8658	0.0048658	503.7	0.00966012	0.966012
Handroanthus 2	0.146	0.192701	1000	4.81753	0.00481753	504.8	0.00954345	0.954345
Handroanthus 3	0.146	0.192701	1000	4.81753	0.00481753	501.9	0.00959859	0.959859	0.960072	0.00583671
Anarcardium 1	0.137	0.175323	1000	4.38309	0.00438309	502.2	0.00872777	0.872777
Anarcardium 2	0.136	0.173393	1000	4.33481	0.00433481	501.2	0.00864887	0.864887
Anarcardium 3	0.134	0.169531	1000	4.23827	0.00423827	503.3	0.00842096	0.842096	0.85992	0.015932
Ziziphus 1	0.063	0.0324387	1000	0.810967	0.000810967	503.8	0.0016097	0.16097
Ziziphus 2	0.062	0.0305078	1000	0.762696	0.000762696	503.2	0.00151569	0.151569
Ziziphus 3	0.065	0.0363004	1000	0.907511	0.000907511	502.8	0.00180491	0.180491	0.164344	0.0147534
Hymenaea 1	0.124	0.150222	1000	3.75555	0.00375555	504.9	0.00743821	0.743821
Hymenaea 2	0.164	0.227457	1000	5.68643	0.00568643	504.7	0.0112669	1.12669
Hymenaea 3	0.16	0.219734	1000	5.49334	0.00549334	503.9	0.0109016	1.09016	0.986893	0.211298
Sideroxylon 1	0.087	0.0787797	1000	1.96949	0.00196949	502.5	0.00391939	0.391939
Sideroxylon 2	0.089	0.0826414	1000	2.06604	0.00206604	502.3	0.00411315	0.411315
Sideroxylon 3	0.079	0.0633327	1000	1.58332	0.00158332	502.8	0.003149	0.3149	0.372718	0.0510005
Poincianella 1	0.123	0.148291	1000	3.70728	0.00370728	501.2	0.00739681	0.739681
Poincianella 2	0.125	0.152153	1000	3.80382	0.00380382	500	0.00760765	0.760765
Poincianella 3	0.116	0.134775	1000	3.36938	0.00336938	502.5	0.00670523	0.670523	0.723656	0.0472069	0.756404	0.303133
Aspidosperma 1	0.104	0.111605	1000	2.79011	0.00279011	500.9	0.0055702	0.55702
Aspidosperma 2	0.101	0.105812	1000	2.6453	0.0026453	501.6	0.00527372	0.527372
Aspidosperma 3	0.102	0.107743	1000	2.69357	0.00269357	503.9	0.00534545	0.534545	0.539646	0.0154683
Mimosa 1	0.164	0.227457	1000	5.68643	0.00568643	504	0.0112826	1.12826
Mimosa 2	0.16	0.219734	1000	5.49334	0.00549334	504.6	0.0108865	1.08865
Mimosa 3	0.164	0.227457	1000	5.68643	0.00568643	503.7	0.0112893	1.12893	1.11528	0.0230636
Commiphora 1	0.1	0.103881	1000	2.59703	0.00259703	503.2	0.00516102	0.516102
Commiphora 2	0.102	0.107743	1000	2.69357	0.00269357	503.4	0.00535076	0.535076
Commiphora 3	0.106	0.115466	1000	2.88666	0.00288666	503.1	0.00573774	0.573774	0.541651	0.0293928
Schinopsis 1	0.192	0.281522	1000	7.03804	0.00703804	504	0.0139644	1.39644
Schinopsis 2	0.195	0.287314	1000	7.18285	0.00718285	503.8	0.0142574	1.42574
Schinopsis 3	0.206	0.308554	1000	7.71384	0.00771384	502.7	0.0153448	1.53448	1.45222	0.0727339
Senegalia b 1	0.098	0.100019	1000	2.50048	0.00250048	504.8	0.00495341	0.495341
Senegalia b 2	0.098	0.100019	1000	2.50048	0.00250048	503.9	0.00496226	0.496226
Senegalia b 3	0.098	0.100019	1000	2.50048	0.00250048	502.3	0.00497807	0.497807	0.496458	0.00124895
Peltogyne 1	0.094	0.0922958	1000	2.3074	0.0023074	501.8	0.00459824	0.459824
Peltogyne 2	0.097	0.0980884	1000	2.45221	0.00245221	503.6	0.00486936	0.486936
Peltogyne 3	0.096	0.0961576	1000	2.40394	0.00240394	503.7	0.00477256	0.477256	0.474672	0.0137397
Piptadenia 1	0.073	0.0517474	1000	1.29369	0.00129369	503.3	0.00257041	0.257041
Piptadenia 2	0.072	0.0498166	1000	1.24541	0.00124541	502.2	0.00247992	0.247992
Piptadenia 3	0.072	0.0498166	1000	1.24541	0.00124541	503.9	0.00247155	0.247155	0.250729	0.00548198
Byrsonima 1	0.093	0.0903649	1000	2.25912	0.00225912	504.9	0.0044744	0.44744
Byrsonima 2	0.105	0.113535	1000	2.83839	0.00283839	501.3	0.00566205	0.566205
Byrsonima 3	0.103	0.109674	1000	2.74184	0.00274184	500.6	0.00547711	0.547711	0.520452	0.063903
Erythroxylum 1	0.106	0.115466	1000	2.88666	0.00288666	504.5	0.00572182	0.572182
Erythroxylum 2	0.104	0.111605	1000	2.79011	0.00279011	504.6	0.00552936	0.552936
Erythroxylum 3	0.103	0.109674	1000	2.74184	0.00274184	504.1	0.00543908	0.543908	0.556342	0.0144413
Pityrocarpa 1	0.101	0.105812	1000	2.6453	0.0026453	502.4	0.00526532	0.526532
Pityrocarpa 2	0.094	0.0922958	1000	2.3074	0.0023074	502.6	0.00459092	0.459092
Pityrocarpa 3	0.097	0.0980884	1000	2.45221	0.00245221	502.9	0.00487614	0.487614	0.491079	0.0338536	0.643853	0.357168

## Sheet:  Table article I
Phenolic content			GO		Average		Standard Deviation		P (< 0.05)					Species			GO	Phenols	Tannins	Flavo
														Myracrodruon urundeuva			1.94	115.501	78.2093	1.01797
Total phenols (mg EAT/100g DM)			High		66.5466		37.955		0.5715					Myracrodruon urundeuva			1.94	116.895	79.8224	1.06227
														Myracrodruon urundeuva			1.94	116.874	81.8642	0.935405
			Low		56.4405		40.4268							Libidibia ferrea			1.74	81.5355	80.94	0.613617
														Libidibia ferrea			1.74	81.9905	82.0856	0.586165
Tannins (mg EAT/100g DM)			High		57.5861		32.5996		0.711					Libidibia ferrea			1.74	83.3081	82.1987	0.621008
														Anadenanthera colubrina			1.69	127.557	122.239	1.09909
			Low		51.7597		36.5055							Anadenanthera colubrina			1.69	126.57	121.498	0.593082
														Anadenanthera colubrina			1.69	127.239	122.419	0.574574
Flavonoids (mg ER/100g DM)			High		0.756404		0.303133		0.457					Ximenia americana L.			1.37	84.149	62.038	1.13942
														Ximenia americana L.			1.37	88.2579	66.1312	1.12625
			Low		0.643853		0.357168							Ximenia americana L.			1.37	90.8804	69.712	1.12046
														Handroanthus impetiginosus			1.27	29.0121	25.1894	0.966012
														Handroanthus impetiginosus			1.27	28.1765	24.1047	0.954345
														Handroanthus impetiginosus			1.27	28.9867	25.064	0.959859
														Anacardium occidentale			1.26	66.7369	50.098	0.872777
														Anacardium occidentale			1.26	71.0186	54.0872	0.864887
														Anacardium occidentale			1.26	69.4313	55.8411	0.842096
														Ziziphus joazeiro			1.23	5.27505	4.20456	0.16097
														Ziziphus joazeiro			1.23	5.02308	3.90828	0.151569
														Ziziphus joazeiro			1.23	5.41477	4.77293	0.180491
														Hymenaea courbaril			1.22	55.84	52.198	0.743821
														Hymenaea courbaril			1.22	54.8322	52.9482	1.12669
														Hymenaea courbaril			1.22	55.8219	53.5051	1.09016
														Sideroxylon obtusifolium			1.18	47.3138	46.025	0.391939
														Sideroxylon obtusifolium			1.18	47.3326	45.3965	0.411315
														Sideroxylon obtusifolium			1.18	49.3533	48.0653	0.3149
														Poincianella pyramidalis			1.09	44.5844	43.2922	0.739681
														Poincianella pyramidalis			1.09	44.9513	44.0892	0.760765
														Poincianella pyramidalis			1.09	46.5379	45.6371	0.670523
														Aspidosperma pyrifolium			0.92	22.9476	19.2333	0.55702
														Aspidosperma pyrifolium			0.92	24.211	19.811	0.527372
														Aspidosperma pyrifolium			0.92	22.2952	18.56	0.534545
														Mimosa tenuiflora			0.74	121.162	98.8239	1.12826
														Mimosa tenuiflora			0.74	120.245	99.1356	1.08865
														Mimosa tenuiflora			0.74	125.878	100.689	1.12893
														Commiphora leptophloeos			0.72	30.8487	30.4226	0.516102
														Commiphora leptophloeos			0.72	30.8364	30.4965	0.535076
														Commiphora leptophloeos			0.72	33.8254	33.5283	0.573774
														Schinopsis brasiliensis			0.62	113.684	107.848	1.39644
														Schinopsis brasiliensis			0.62	108.571	102.56	1.42574
														Schinopsis brasiliensis			0.62	107.516	101.837	1.53448
														Senegalia bahiensis			0.36	12.2154	9.85986	0.495341
														Senegalia bahiensis			0.36	11.2056	8.67395	0.496226
														Senegalia bahiensis			0.36	11.7588	9.43462	0.497807
														Peltogyne pauciflora			0.29	49.8401	47.1683	0.459824
														Peltogyne pauciflora			0.29	51.4683	48.462	0.486936
														Peltogyne pauciflora			0.29	52.3611	49.3984	0.477256
														Piptadenia stipulacea			0.21	12.51	10.9221	0.257041
														Piptadenia stipulacea			0.21	12.1493	10.601	0.247992
														Piptadenia stipulacea			0.21	12.4951	10.8231	0.247155
														Byrsonima gardneriana			0.21	102.414	99.6773	0.44744
														Byrsonima gardneriana			0.21	103.668	100.479	0.566205
														Byrsonima gardneriana			0.21	82.2665	81.4098	0.547711
														Erythroxylum revolutum			0.15	44.0351	41.0771	0.572182
														Erythroxylum revolutum			0.15	41.9661	39.3521	0.552936
														Erythroxylum revolutum			0.15	41.4921	38.5747	0.543908
														Pityrocarpa moniliformis			0.14	63.3606	61.1231	0.526532
														Pityrocarpa moniliformis			0.14	63.4647	61.9176	0.459092
														Pityrocarpa moniliformis			0.14	62.5224	60.8901	0.487614
